# Supplementary material for: Polystyrene nanoplastics accumulate in ZFL cell lysosomes and in zebrafish larvae after acute exposure, inducing a synergistic immune response in vitro without affecting larval survival in vivo
Source: Royal Society of Chemistry journal article supplement (doi:10.1039/d0en00553c), 2020-01-01
Supplement: d0en00553c1.pdf [file d0en00553c1.pdf]

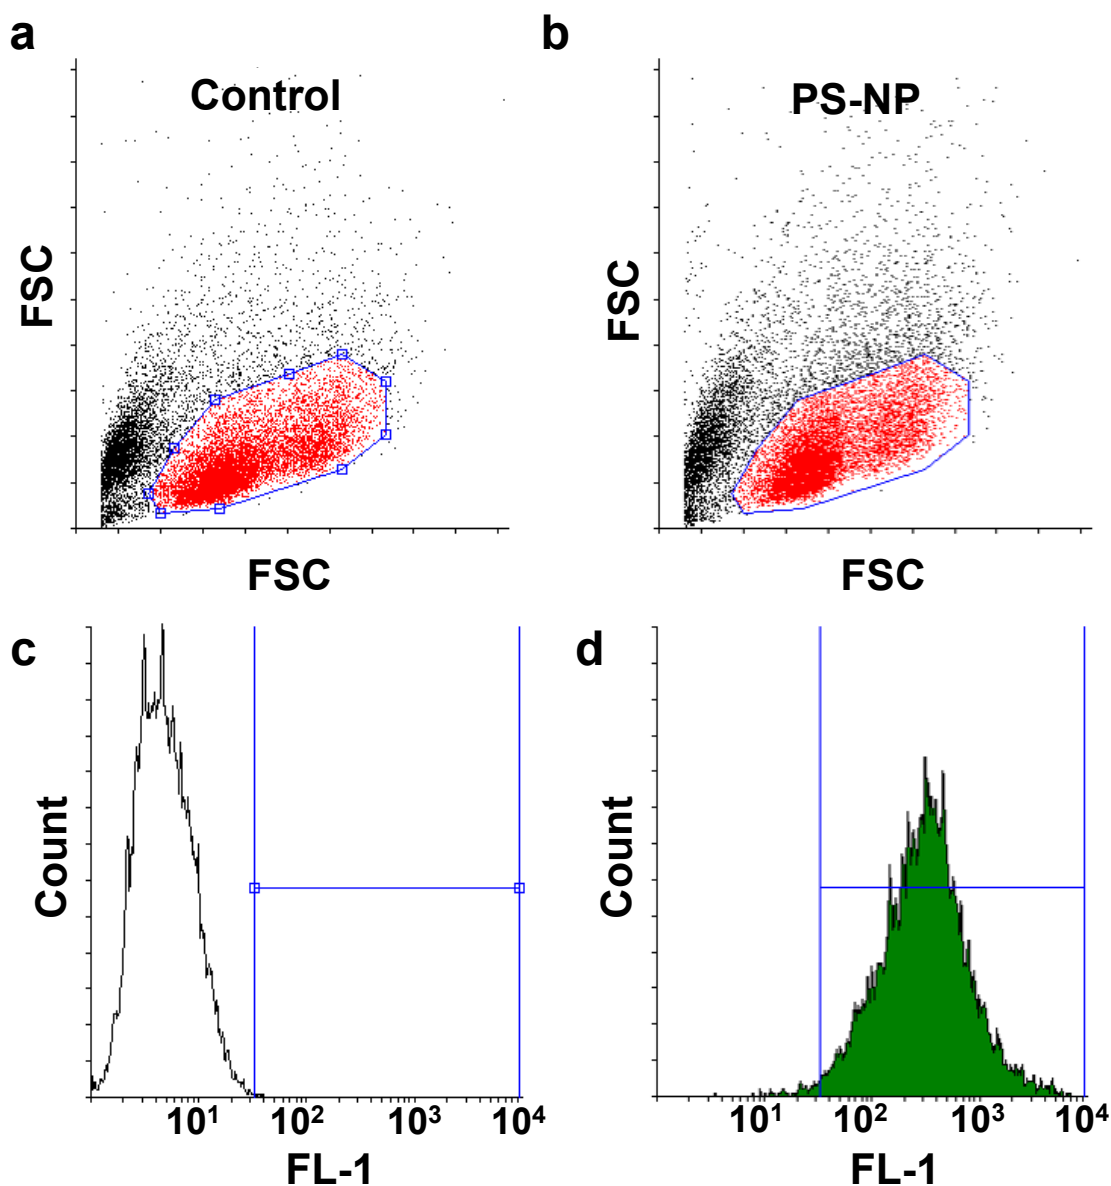

**Supplementary Figure 1. ZFL cells Flow cytometry analysis strategy.** Representative dot plots and the gating strategy (a, b), with red dots representing the gated population and black dots showing cellular debris and events outside of the relevant population. Histograms of fluorescence are shown (c, d). Cells were incubated as follows: unexposed control cells (a, c) and 50 mg/l PS-NPs exposed cells (b, d).

# Supplementary Figure 2

**a**

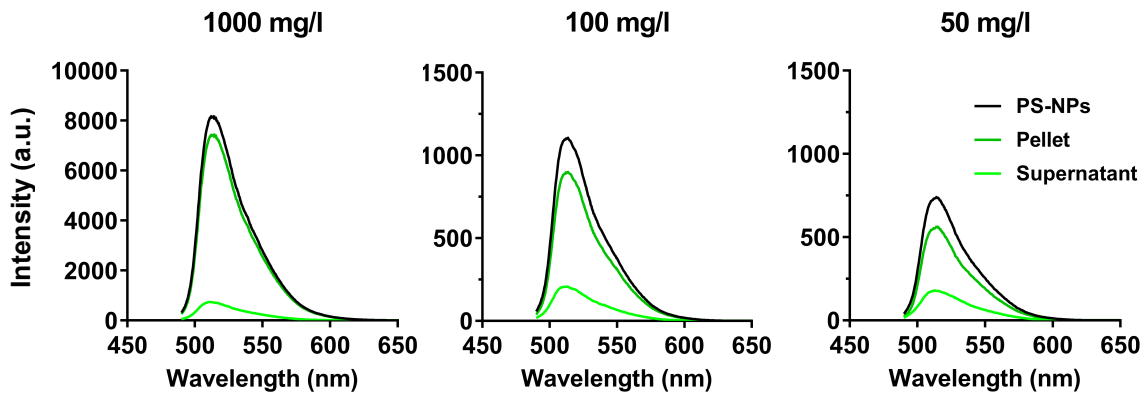

**b**

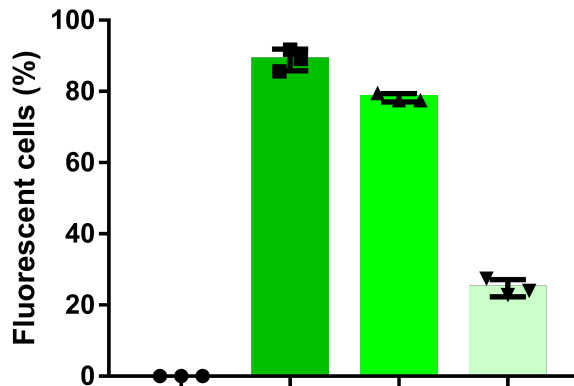

**c**

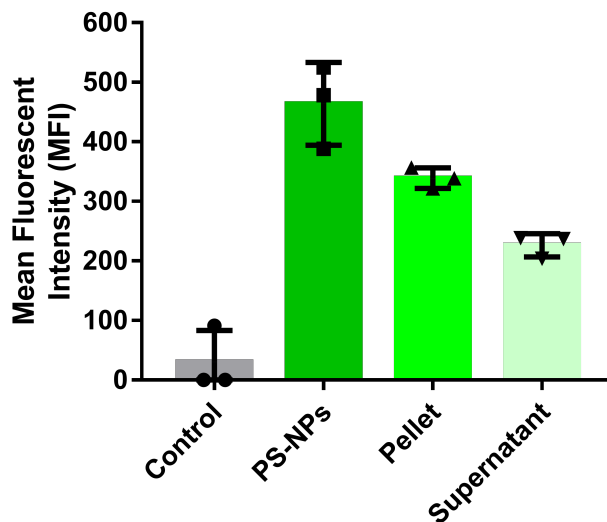

**Supplementary Figure 2. Fluorophore leaking analysis from labelled PS-NPs.** (a) Curves of fluorescence intensity of PS-NPs diluted from stock solution, without further manipulation (PS-NPs), and of obtained fractions after manipulation (Pellet, Supernatant). (b, c) Cytometry analysis showing the internalization of PS-NPs, Pellet and Supernatant fractions by ZFL cells (*in vitro*). (b) Percentage of fluorescent cells of PS-NPs (dark green), Pellet (green) and Supernatant (light green). (c) Mean fluorescence intensity (MFI) of PS-NPs (dark green), Pellet (green) and Supernatant (light green). Data represent the mean  $\pm$  SD of three samples.

**a**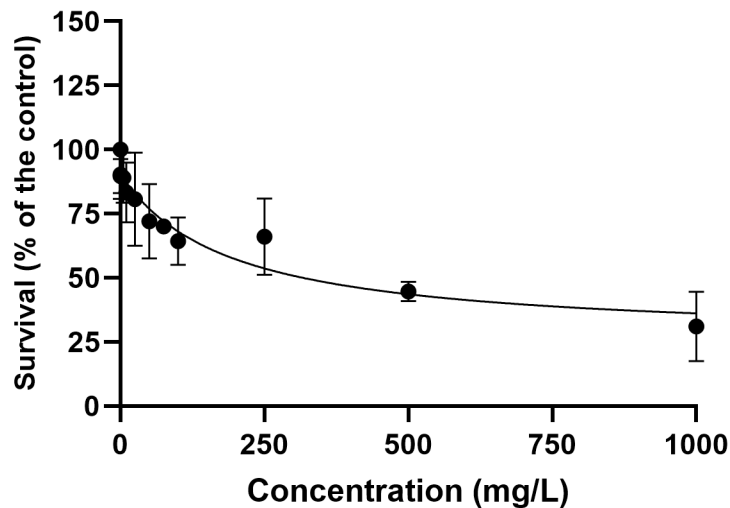

**Supplementary Figure 3. Dose-response curve.** ZFL cells were exposed to an increasing concentration range (from 0.05 to 1000 mg/l) of PS-NPs. Lethal doses (LD50) were estimated using a nonlinear regression fitting curve (3 P) using GraphPad Prism 8.0.1 (244). The lethal dose for 50% (LD50) of the cells were estimated at 188.8 mg/l.

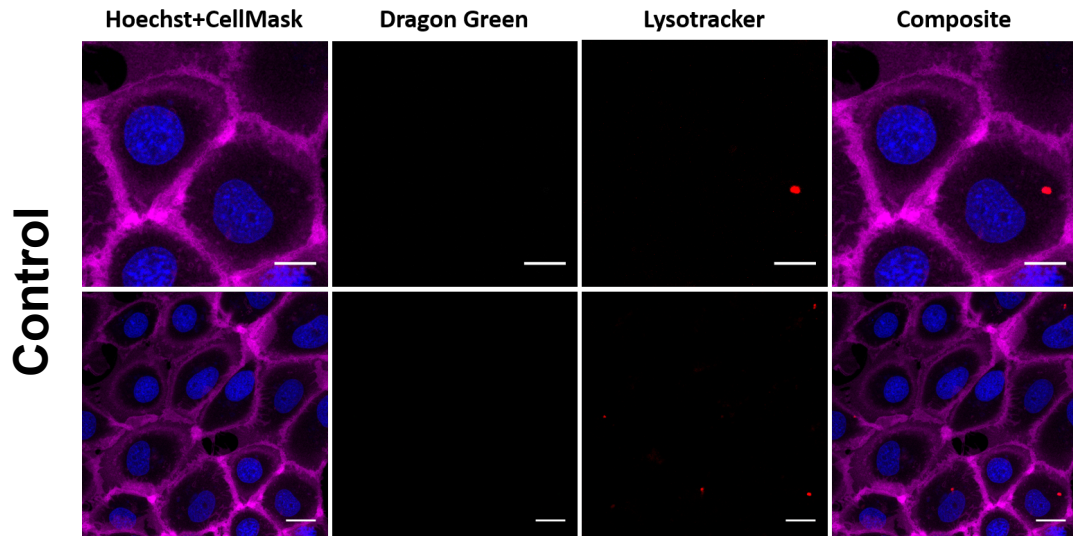

**Supplementary Figure 4.** Confocal images of control ZFL cells. Blue fluorescence corresponds to Hoechst stained nuclei, magenta to Cell Mask stained plasma membrane and red to Lysotracker stained lysosomes.

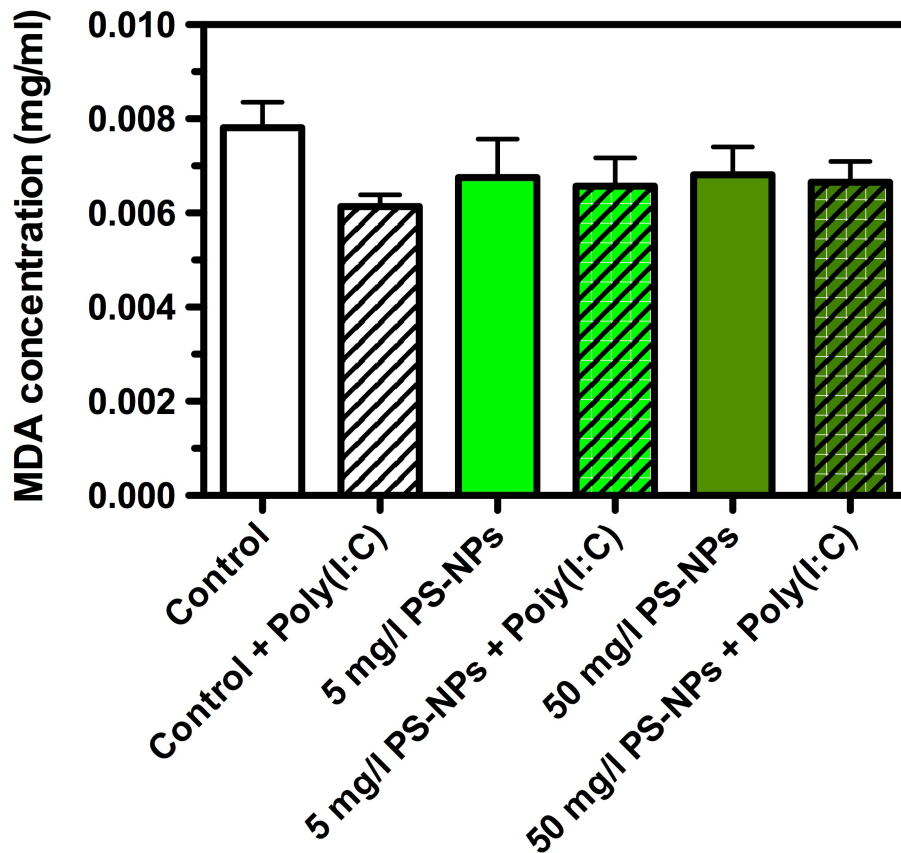

**Supplementary Figure 5. Lipid peroxidation in ZFL cells exposed to PS-NPs.** Lipid peroxidation assessed through the presence of malondialdehyde (MDA) in ZFL cells after exposure to PS-NPs followed by Poly(I:C) stimulus for 16 h. Cells were incubated as follows: unexposed control cells (white), 5 mg/l PS-NPs (light green) and 50 mg/l PS-NPs (dark green).

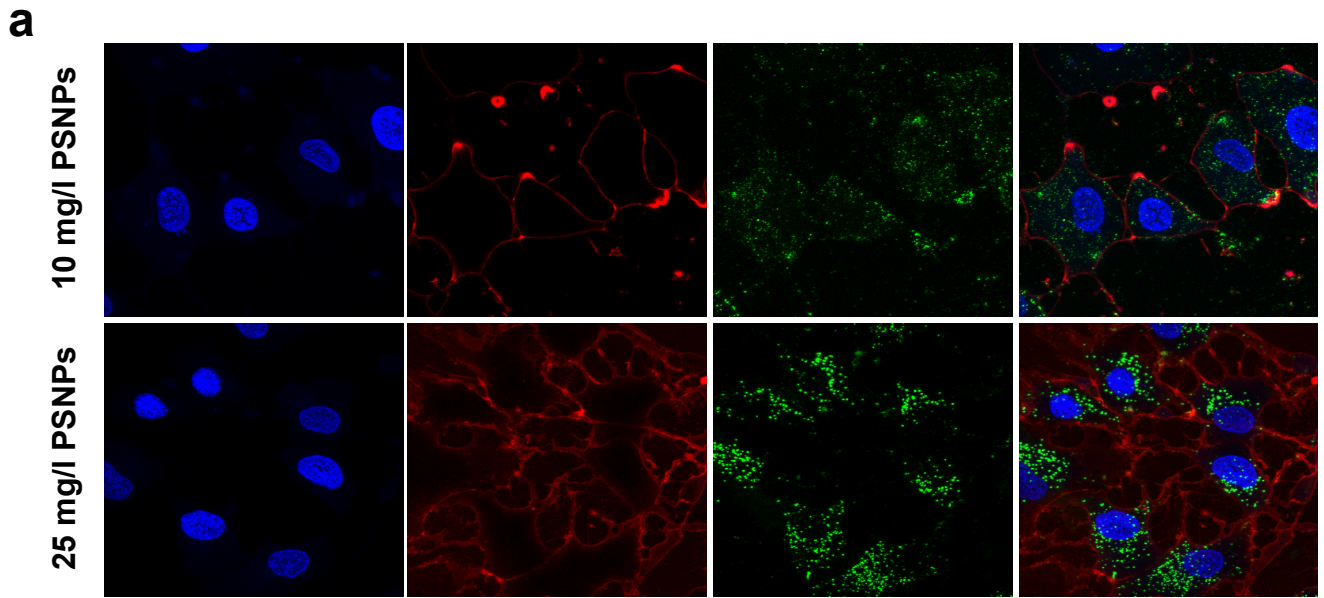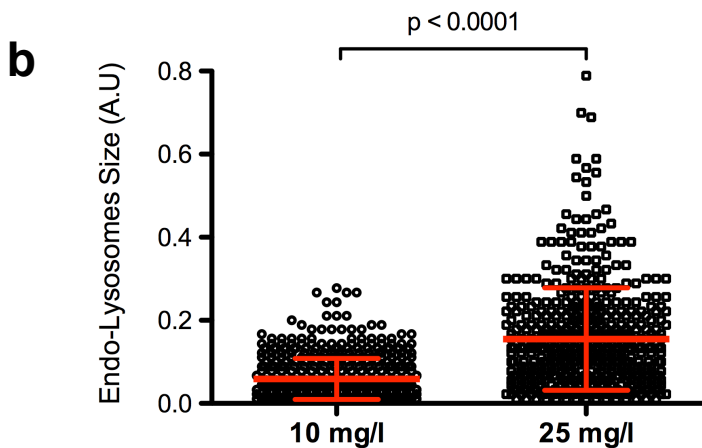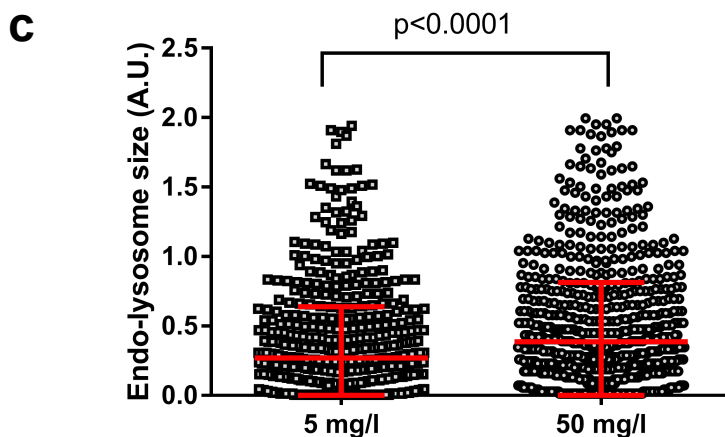

**Supplementary Figure 6. PS-NPs internalization in RTGut cells and cluster size analysis. a.** Representative confocal microscopy images of RTGut cells showing the internalization of PS-NPs, after 16 h incubation at 10 and 25 mg/l. Green fluorescence corresponds to PS-NPs, blue to Hoechst stained nuclei and red to WGA555 stained plasma membrane. **b.** RTGut cells cluster size analysis at both concentrations performed with ImageJ. **c.** ZFL cells cluster size analysis at both concentrations performed with ImageJ from corresponding images in Figure 2e and g.

Table 1. Real Time primers.

| Gene         | Primer sequence (5'-3')   | Product size (bp) | Accession number |
|--------------|---------------------------|-------------------|------------------|
| <i>ef1-α</i> | FW_CTTCTCAGGCTGACTGTGC    | 133               | AY422992         |
|              | RV_ACGATCAGCTGTTTCACTCCC  |                   |                  |
| <i>mx</i>    | FW_ACATCTTGGATCGTTCAGGGGA | 163               | NM_182942.4      |
|              | RV_AACGCAGGTTCTCCAACAG    |                   |                  |
| <i>vig-1</i> | FW_CTTATAGGTCGAGCACAGGGC  | 165               | NM_001025556.1   |
|              | RV_ACGTACTGGATTGAGAGCGGTG |                   |                  |
| <i>gig2</i>  | FW_AGGGTACGACACTGCCTGGT   | 148               | NM_001245989.1   |
|              | RV_AGGGTCACCAAAGCCACAAT   |                   |                  |

**Table 2.** Zebrafish larvae mortality (%) after continuous exposure to different concentrations of PS-NPs.

## ZEBRAFISH LARVAE MORTALITY (%)

| Exposure Group | 60 h  | 96 h  |
|----------------|-------|-------|
| 0 mg /l        | 6,7%  | 6,7%  |
| 50 mg/l        | 7,1%  | 35,7% |
| 100 mg/l       | 71.4% | 100%  |
